# Supplementary material
Source: MDPI journal article supplement (https://www.mdpi.com/2071-1050/3/8/1250)
Supplement: s1 [file s1]

## Additional Resources

Bahadur, Aditya V., Ibrahim, Maggie, Tanner, Thomas. *The resilience renaissance? Unpacking of resilience for tackling climate change and disasters*. Institute of Development Studies, University of Sussex Brighton BN1 9RE, UK. 2010. (last accessed 28 June 2011).

<http://community.eldis.org/.59e0d267/resilience-renaissance.pdf>

Cutter, Susan L., Barnes, Lindsey, Berry, Melissa, et.al. *Community and Regional Resilience: Perspectives from Hazards, Disasters, and Emergency Management*. Hazards and Vulnerability Research Institute, Department of Geography, University of South Carolina. Columbia, South Carolina. September 2008. (last accessed 28 June 2011).

[http://www.resilientus.org/library/FINAL\\_CUTTER\\_9-25-08\\_1223482309.pdf](http://www.resilientus.org/library/FINAL_CUTTER_9-25-08_1223482309.pdf)

Few, Roger, Osbahr, Henny, Bouwer, Laurens M., Viner, David, Sperling, Frank. *Linking Climate Change Adaptation and Disaster Risk Management for Sustainable Poverty Reduction*. Synthesis Report. A study carried out for the Vulnerability and Adaptation Resource Group (VARG) with support from the European Commission. November 2006. (last accessed 20 June 2011).

[http://ec.europa.eu/development/icenter/repository/env\\_cc\\_varg\\_adaptation\\_en.pdf](http://ec.europa.eu/development/icenter/repository/env_cc_varg_adaptation_en.pdf)

O'Brien, K. et al. *Disaster Risk Reduction, Climate Change Adaptation and Human Security*. Report prepared for the Royal Norwegian Ministry of Foreign Affairs by the Global Environmental Change and Human Security (GECHS) Project, GECHS Report 2008:3. (last accessed 21 June 2011).

[http://www.gechs.org/downloads/GECHS\\_Report\\_3-08.pdf](http://www.gechs.org/downloads/GECHS_Report_3-08.pdf)

Patwardhan, Anand, Ajit, Meeta. *Disaster Prevention, Preparedness and Management and Linkages with Climate Change Adaptation*. Technology Information, Forecasting and Assessment Council, New Delhi. Funded by the Environment Directorate of the European Commission. September 2007. (last accessed 11 June 2011).

<http://www.basic-project.net/data/final/Paper10India%20Disaster%20Prevention%20%20Preparedness%20%20Linkages%20w%85.pdf>

Pelling, Mark, Maskrey, Andrew, Ruiz, Pablo and Hall, Lisa, Editors. *Reducing Disaster Risk: A Challenge for Development*. United Nations Development Programme Bureau for Crisis Prevention and Recovery. 2004. (last accessed 28 June 2011).

[http://www.undp.org/cpr/whats\\_new/rdr\\_english.pdf](http://www.undp.org/cpr/whats_new/rdr_english.pdf)

Pollner, John, Kryspin-Watson, Jolanta, Nieuwejaar, Sonja. *Disaster Risk Management and Climate Change Adaptation in Europe and Central Asia*. Sustainable Development Department, Europe and Central Asia Region. Global Facility for Disaster Reduction and Recovery. The World Bank. April 2010. (last accessed 15 June 2011).

[http://www.gfdr.org/gfdr/sites/gfdr.org/files/publication/GFDRR\\_DRM\\_and\\_CCA\\_ECA.pdf](http://www.gfdr.org/gfdr/sites/gfdr.org/files/publication/GFDRR_DRM_and_CCA_ECA.pdf)

Schmidt, Annette, Bloemertz, Lena, Macamo, Elisio, Editors. *Linking Poverty Reduction and Disaster Risk Management*. German Committee for Disaster Reduction. 2005. (last accessed 28 June 2011).

[http://www.preventionweb.net/files/1092\\_enlinkingpovreddrm.pdf](http://www.preventionweb.net/files/1092_enlinkingpovreddrm.pdf)

*World Resources 2008: Roots of Resilience - Growing the Wealth of the Poor*. World Resources Institute (WRI) in collaboration with United Nations Development Programme, United Nations Environment Programme, and World Bank. 2008. (last accessed 28 June 2011).

[http://pdf.wri.org/world\\_resources\\_2008\\_roots\\_of\\_resilience.pdf](http://pdf.wri.org/world_resources_2008_roots_of_resilience.pdf)
